# Supplementary material for: Forest Aboveground Biomass Estimation and Mapping through High-Resolution Optical Satellite Imagery—A Literature Review
Source: MDPI journal article supplement (doi:10.3390/f12070914), 2021-07-14
Supplement: s1 [file s1]

## Supplementary Materials

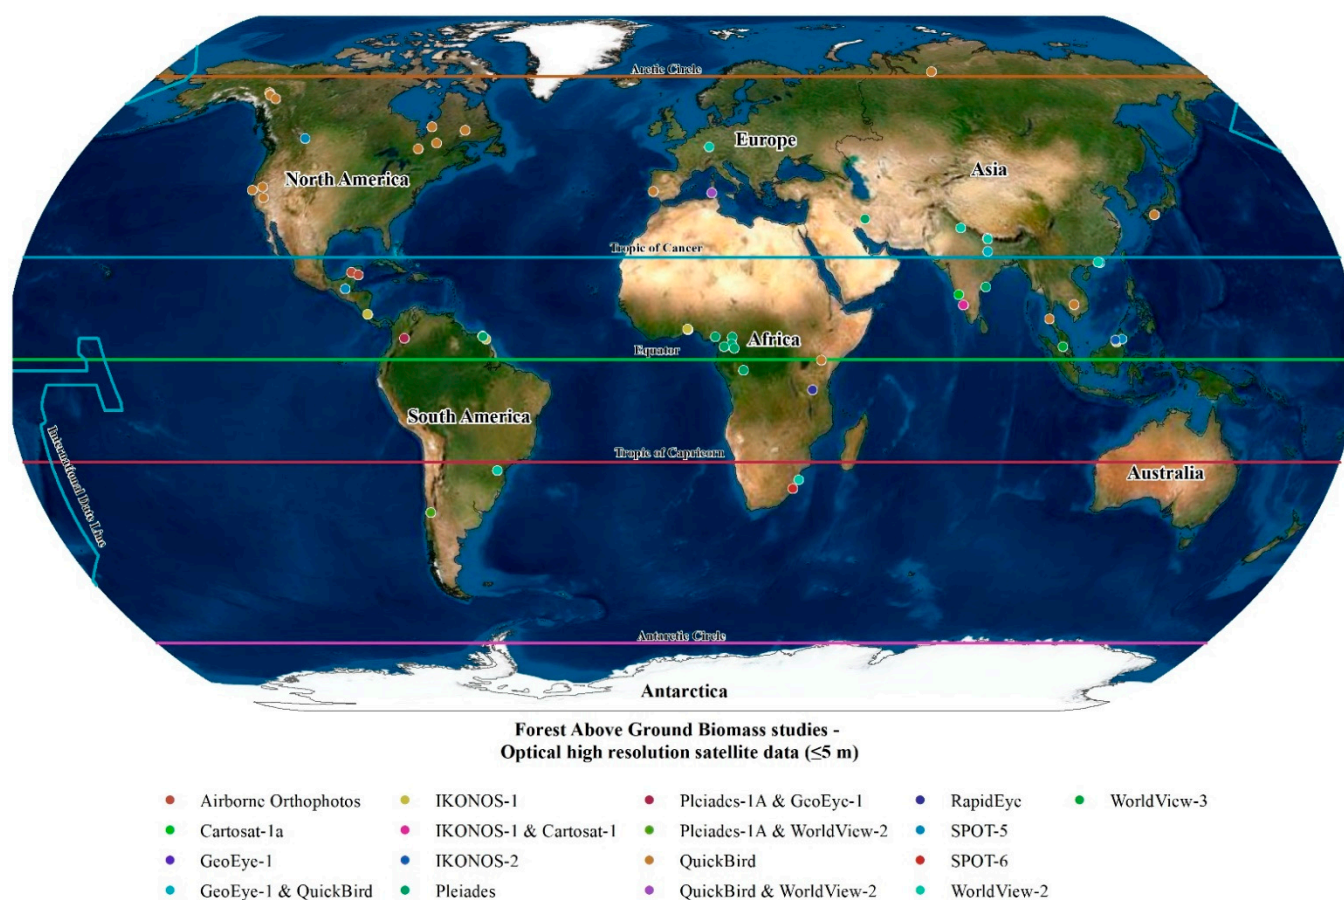

**Figure S1.** A catalog of 44 peer-reviewed studies published between 2004 to 2019 on forest AGB estimation and mapping through optical high-resolution satellite imagery ( $\leq 5$  m spatial resolution).

**Table S1.** A catalog of 44 peer-reviewed studies published between 2004 to 2019 on forest AGB estimation and mapping through optical high-resolution satellite imagery ( $\leq 5$  m spatial resolution).

| No. | Reference | Continent     | Country    | Latitude                         | Longitude                        | Altitude (m) | The Study Area (ha) | Forest Type            | High-Resolution Satellite Data | Other Satellite Data           |
|-----|-----------|---------------|------------|----------------------------------|----------------------------------|--------------|---------------------|------------------------|--------------------------------|--------------------------------|
| 1   | [10]      | North America | Costa Rica | 10.431                           | −84.004                          | 35–150       | 600                 | Tropical wet evergreen | IKONOS                         | –                              |
| 2   | [51]      | Africa        | Benin      | 6.883 (Site 1)<br>7.083 (Site 2) | 1.683 (Site 1)<br>1.667 (Site 2) | –            | 13,500              | West African oil palm  | IKONOS                         | –                              |
| 3   | [39]      | North America | USA        | 37.128                           | −119.29                          | 853–2743     | 60,000              | Mixed coniferous       | QuickBird                      | LiDAR, Landsat ETM+, SAR/inSAR |
| 4   | [24]      | Africa        | Kenya      | −0.15                            | 37.3                             | 1200–3400    | 313,256             | Afromontane broadleaf  | QuickBird                      | Landsat ETM+                   |
| 5   | [34]      | North America | Canada     | 49.917 (Site 1)                  | −74.367 (Site 1)                 |              | 14,700              | Mixed coniferous       | QuickBird                      | –                              |

|    |      |               |               |                    |                      |           |                                                                |                             |                        |              |
|----|------|---------------|---------------|--------------------|----------------------|-----------|----------------------------------------------------------------|-----------------------------|------------------------|--------------|
|    |      |               |               | 53.794 (Site 2)    | −77.618 (Site 2)     |           | 9300                                                           |                             |                        |              |
|    |      |               |               | 52.908 (Site 3)    | −66.869 (Site 3)     |           | 10,700                                                         |                             |                        |              |
| 6  | [25] | Africa        | French Guiana | 4.750 (Site 1)     | −52.083 (Site 1)     | –         | 3600 (Site 1)                                                  | Mangrove                    | IKONOS                 | –            |
|    |      |               |               | 5.433 (Site 2)     | −53.033 (Site 2)     |           | 4400 (Site 2)                                                  |                             |                        |              |
| 7  | [35] | North America | Canada        | 48.5               | −79.367              | 227–348   | 11,000                                                         | Mixed coniferous            | IKONOS                 | LiDAR        |
| 8  | [47] | Asia          | Siberia       | 67.8               | 86.717               | 11        | 45                                                             | Deciduous                   | QuickBird              | ASTER        |
| 9  | [19] | Asia          | Japan         | 33.266             | 133.016              | –         | 3300                                                           | Coniferous                  | QuickBird              | –            |
| 10 | [48] | North America | Mexico        | 16.264             | −90.657              | –         | 2000 (Site 1)<br>2500 (Site 2)                                 | Tropical rainforest         | SPOT-5                 | –            |
| 11 | [20] | North America | USA           | 38.890 (Site 1)    | −123.320 (Site 1)    | –         | 5900 (Site 1)<br>5800 (Site 2)                                 | Conifer and hardwood forest | QuickBird              | –            |
| 12 | [21] | North America | Canada        | 62.294551 (Site 1) | −136.310514 (Site 1) | –         | 625 (Site 1)<br>2400 (Site 2)<br>625 (Site 3)<br>1375 (Site 4) | Mixed                       | QuickBird              | Landsat ETM+ |
|    |      |               |               | 61.854901 (Site 2) | −135.672753 (Site 2) |           |                                                                |                             |                        |              |
|    |      |               |               | 61.625741 (Site 3) | −135.379302 (Site 3) |           |                                                                |                             |                        |              |
|    |      |               |               | 60.758427 (Site 4) | −132.745319 (Site 4) |           |                                                                |                             |                        |              |
| 13 | [11] | North America | Canada        | 51.02              | −115.07              | 1400–2100 | 18,000                                                         | Conifer and deciduous       | SPOT-5                 | –            |
| 14 | [26] | Asia          | Hong Kong     | 22.331             | 114.129              | –         | –                                                              | Mixed                       | SPOT-5                 | –            |
| 15 | [52] | North America | Canada        | 48.5               | −79.367              | –         | 16,330                                                         | Mixed                       | QuickBird              | –            |
| 16 | [45] | Africa        | South Africa  | −27.567            | 32.35                | –         | 7000                                                           | Mangrove                    | WorldView-2            | –            |
| 17 | [27] | Asia          | India         | 12.538             | 75.663               | 200–1000  | 3000                                                           | Wet Evergreen               | IKONOS                 |              |
| 18 | [53] | Asia          | Thailand      | 9.367              | 98.4                 | –         | 151                                                            | Mangrove                    | GeoEye-1               | ASTER        |
| 19 | [28] | Africa        | Congo         | −2.485             | 16.502               | 300–500   | 40,000                                                         | Mixed                       | GeoEye-1 and QuickBird | –            |
| 20 | [12] | Asia          | Thailand      | 9.384              | 98.416               | –         | –                                                              | Mangrove                    | QuickBird              | –            |
| 21 | [7]  | Asia          | Nepal         | 27.952             | 84.624               | 600–1100  | 5827                                                           | Mixed                       | GeoEye-1               | –            |
| 22 | [13] | Asia          | Nepal         | 27.669             | 84.624               | 245–1944  | 977                                                            | Tropical broadleaved        | GeoEye-1               | –            |
| 23 | [14] | Asia          | Indonesia     | 4                  | 116                  | 1000–1400 | –                                                              | Mixed                       | IKONOS                 | –            |
| 24 | [29] | Asia          | Malaysia      | 4.75               | 117.5                | –         | 7200                                                           | Mixed                       | SPOT-5                 | –            |
| 25 | [36] | Europe        | Portugal      | 38.659             | −8.121               | 200       | 8000                                                           | Evergreen oak forests       | QuickBird              | –            |
| 26 | [17] | Asia          | Nepal         | 27.669             | 84.624               | 245–1944  | 977                                                            | Tropical broadleaved        | WorldView-2            | LiDAR        |
| 27 | [55] | Europe        | Germany       | 49.006             | 8.403                | 109–114   | 900                                                            | Mixed                       | Pleiades-1A and        |              |

|    |      |               |              |                    |                    |           |         |                                 |                          |                           |
|----|------|---------------|--------------|--------------------|--------------------|-----------|---------|---------------------------------|--------------------------|---------------------------|
|    |      |               |              |                    |                    |           |         |                                 | WorldView-2              |                           |
| 28 | [54] | Europe        | Germany      | 49.006             | 8.403              | 109–114   | 900     | Mixed                           | WorldView-2              | EO1-hyperion and Tandem-X |
| 29 | [46] | Asia          | China        | 22.42              | 113.637            | –         | 700     | Mangrove                        | WorldView-2              |                           |
| 30 | [43] | South America | Colombia     | 4.891              | –73.942            | 2800      |         | Mixed                           | Pleiades-1A and GeoEye-1 |                           |
| 31 | [30] |               | Congo        | –2.454267          | 16.483275          | –         | 28      | Tropical forests                | Pleiades                 | –                         |
|    |      |               |              | 5.189338 (Site 1)  | 13.52147 (Site 1)  | –         | 15      |                                 |                          |                           |
|    |      |               |              | 5.274167 (Site 2)  | 9.066293 (Site 2)  | –         | 50      |                                 |                          |                           |
|    |      |               |              | 3.100774 (Site 3)  | 13.598995 (Site 3) | –         | 10      |                                 |                          |                           |
|    |      |               |              | 3.163553 (Site 4)  | 13.630282 (Site 4) | –         | 8       |                                 |                          |                           |
|    |      |               |              | –0.750042 (Site 5) | 10.58335 (Site 5)  | –         | 12      |                                 |                          |                           |
|    |      |               |              | 3.556298 (Site 6)  | 13.414816 (Site 6) | –         | 11      |                                 |                          |                           |
|    |      |               |              | 3.576823 (Site 7)  | 13.396691 (Site 7) | –         | 12      |                                 |                          |                           |
|    |      |               |              | 2.624149 (Site 8)  | 14.026847 (Site 8) | –         | 6       |                                 |                          |                           |
|    |      |               |              | 2.941681 (Site 9)  | 11.394794 (Site 9) | –         | 5       |                                 |                          |                           |
|    |      |               |              | 16.749835 (Site 1) | 82.189234 (Site 1) | –         | 15      |                                 |                          |                           |
|    |      |               |              | 14.943495 (Site 2) | 74.694572 (Site 2) | –         | 22      |                                 |                          |                           |
|    |      |               |              | 5.274348           | –52.925654         | –         | 85      |                                 |                          |                           |
| 32 | [56] | Asia          | India        | 30.2               | 77.8               | –         | –       | Tropical moist deciduous forest | WorldView-2              | LiDAR (ICESat/GLAS)       |
| 33 | [16] | Asia          | Malaysia     | 4.451243           | 115.725106         | 1150–1500 | 7036    | Tropical rainforest             | IKONOS-2                 | SRTM DEM, LiDAR           |
| 34 | [31] | Asia          | India        | 12.5375            | 75.66277778        | 200–1000  | 3000    | Wet Evergreen forest            | IKONOS, Cartosat-1       | LiDAR                     |
| 35 | [15] | Europe        | Portugal     | 38.28222222        | 8.755277778        | 65        | 1033    | Maritime pine pure stands       | QuickBird, WorldView-2   | –                         |
| 36 | [32] | Asia          | India        | 14.96225222        | 74.70614444        | 457       | 150,000 | Tropical forests                | Cartosat-1a              | –                         |
| 37 | [18] | Asia          | Malaysia     | 3.006719444        | 101.6403444        | 15–233    | 1248    | Tropical forests                | WorldView-3              | LiDAR                     |
| 38 | [33] | Africa        | South Africa | –29.643056         | 30.976389          | 200–325   | 52,060  | Tropical dry forest             | SPOT-6                   | –                         |
| 39 | [37] | Asia          | Nepal        | 24.85              | 84                 | 113–1826  | 8000    | Subtropical forest              | GeoEye, QuickBird        | Landsat 8 OLI             |

|    |      |               |          |                                        |                                       |                            |                                  |                      |                                                           |                                            |
|----|------|---------------|----------|----------------------------------------|---------------------------------------|----------------------------|----------------------------------|----------------------|-----------------------------------------------------------|--------------------------------------------|
| 40 | [49] | Asia          | Cambodia | 12.6821                                | 105.373055                            | -                          | 48,200                           | Dry evergreen forest | QuickBird                                                 | Airborne LiDAR, digital aerial photographs |
| 41 | [44] | South America | Brazil   | -25.45                                 | -50.583                               | 893                        | 48                               | Araucaria forest     | WorldView-2                                               | -                                          |
| 42 | [50] | North America | Mexico   | 20.08335 (Site 1)<br>19.48335 (Site 2) | -89.55 (Site 1)<br>-87.56665 (Site 2) | 10 (Site 1)<br>30 (Site 2) | 1800 (Site 1)<br>47,223 (Site 2) | Tropical dry forest  | Airborne Orthophoto s (Vexcel UltraCam LP digital camera) | LiDAR                                      |
| 43 | [38] | Asia          | Iran     | 32.25680556                            | 51.42                                 | 1960                       | 1500                             | Mixed                | Pleiades                                                  | -                                          |
| 44 | [23] | Africa        | Tanzania | -7                                     | 35                                    | -                          | 94,509,000                       | Mixed                | RapidEye                                                  | -                                          |

**Table S2.** A list of keywords/terms used in searching for the literature.

| Sr. No. | Keywords/Terms               |
|---------|------------------------------|
| 1       | AGB                          |
| 2       | Remote sensing               |
| 3       | Optical data                 |
| 4       | High-resolution              |
| 5       | Satellite imagery            |
| 6       | RapidEye                     |
| 7       | SPOT                         |
| 8       | QuickBird                    |
| 9       | IKONOS                       |
| 10      | WorldView                    |
| 11      | GeoEye                       |
| 12      | Biomass estimation           |
| 13      | Very-high-spatial-resolution |
| 14      | AGB quantification           |
| 15      | Tropical forest biomass      |
| 16      | Pleiades                     |
| 17      | Cartosat                     |
| 18      | Airborne imagery             |
| 19      | Forest AGB                   |
| 20      | Tropical forest mapping      |

**Table S3.** A database of methodology, accuracy, and average AGB values published in 44 peer-reviewed articles (2004–2019) for forest AGB estimation and mapping using high-resolution satellite imagery.

| No. | Reference | Model Applied | Parameters                                                                                     | Number of Samples for Model Formation | Equation          | Model Coefficient Value ( $R^2$ ) | Number of Samples for Model Validation | Validation Coefficient Value ( $R^2$ ) | Estimated Biomass (kg/ha or ton/ha or Mg/ha) |
|-----|-----------|---------------|------------------------------------------------------------------------------------------------|---------------------------------------|-------------------|-----------------------------------|----------------------------------------|----------------------------------------|----------------------------------------------|
| 1   | [10]      | Linear        | Plot basal area = ( $R^2$ = 0.779) and aboveground biomass from stem (EAGB) = ( $R^2$ = 0.786) | 18                                    | $Y = 77.6 - 9.7X$ | 0.63                              | 18                                     | 0.786                                  | –                                            |

|   |      |                                       |                                                                                                                                                                                                                                                                                                                                                  |     |   |                                                                                                                          |    |               |                                                                                                                 |
|---|------|---------------------------------------|--------------------------------------------------------------------------------------------------------------------------------------------------------------------------------------------------------------------------------------------------------------------------------------------------------------------------------------------------|-----|---|--------------------------------------------------------------------------------------------------------------------------|----|---------------|-----------------------------------------------------------------------------------------------------------------|
| 2 |      | Non-linear (Multiple and Exponential) | Ikonos NDVI43 Dry biomass = ( $R^2 = 0.63$ )<br>Ikonos band 3 dry biomass = ( $R^2 = 0.65$ )                                                                                                                                                                                                                                                     | 208 | – | Dry biomass = ( $R^2 = 0.63$ ) ( $R^2 = 0.65$ )<br>Oil palm biomass = ( $R^2 = 0.50$ )<br>Wet biomass = ( $R^2 = 0.72$ ) | 77 | 0.64 and 0.72 | 29.5 and 29.88 ton/ha                                                                                           |
| 3 | [51] | Non-linear (Multiple and Exponential) | Standard deviation canopy height ( $R^2 = 0.64$ , RMSE = 3.2)<br>Biomass ( $R^2 = 0.83$ , RMSE = 66.6 mg/ha)                                                                                                                                                                                                                                     | 120 | – | 0.77                                                                                                                     | –  | 0.83          | –                                                                                                               |
| 4 |      | Linear                                | For tea, the combination of NIR with homogeneity, entropy and second-moment textures gave the best and similar results ( $R^2 = 0.684$ ). For young pine trees, correlation texture gave the overall best results ( $R^2 = 0.741$ ), and for older pine trees, contrast texture gave the best results ( $R^2 = 0.753$ ) as independent variables | –   | – | 0.684                                                                                                                    | –  | –             | 6.502 kg for tea, 7.505 kg for young pine trees (3.5 years old) and 9.779 kg for older pine trees (6 years old) |
| 5 |      | Linear                                | –                                                                                                                                                                                                                                                                                                                                                | 108 | – | 0.85 to 0.87                                                                                                             | 32 | 0.84          | 163.5 t/ha                                                                                                      |
| 6 | [39] | Non-linear (multiple and exponential) | We estimated biomass from multiple linear regression models using the three textural indices (scores of the three main PCA axes) as independent variables. Results were compared according to the window size for both PA and NIR data. The best results were obtained from the predictions of AGB values from PA data, with $R^2$ above 0.87    | –   | – | 0.79                                                                                                                     | –  | 0.87          | –                                                                                                               |
| 7 |      | Linear                                | –                                                                                                                                                                                                                                                                                                                                                | 57  | – | 0.79                                                                                                                     | 25 | –             | –                                                                                                               |
| 8 | [24] | Linear                                | k-NN                                                                                                                                                                                                                                                                                                                                             | 7   | – | –                                                                                                                        | –  | –             | –                                                                                                               |

|      |                                       |                                                                                                                                                                                                                                                                                                                                                                                                       |                  |   |                        |    |      |                                                                                                                            |
|------|---------------------------------------|-------------------------------------------------------------------------------------------------------------------------------------------------------------------------------------------------------------------------------------------------------------------------------------------------------------------------------------------------------------------------------------------------------|------------------|---|------------------------|----|------|----------------------------------------------------------------------------------------------------------------------------|
| 9    | Non-linear (multiple and exponential) | The coefficients of determination of the non-linear regression analysis to investigate the relationship between the estimates of parameters $a^*$ and $b^*$ of the allometric model and stand variables such as stand age, stand density, mean stand DBH, mean stand tree height, and relative spacing, simultaneously, were 0.84 and 0.87 for <i>C. japonica</i> and <i>C. obtusa</i> , respectively | 26               | – | 0.58–0.95<br>0.66–0.94 | 26 | 0.64 | –                                                                                                                          |
| 10   | Linear (multiple)                     | The $R^2$ of the final models was 0.58 for basal area, 0.70 for canopy height, 0.73 for bole volume, and 0.71 for biomass                                                                                                                                                                                                                                                                             | 94               | – | 0.737                  | 87 | 0.71 | 59.3 ton/ha                                                                                                                |
| [34] |                                       | Validation of QuickBird crown diameters against field measurements of the same trees showed a significant correlation ( $R = 0.82$ , $p < 0.05$ ).                                                                                                                                                                                                                                                    |                  |   |                        |    |      |                                                                                                                            |
| 11   | Non-linear (Multiple)                 | Comparison of stand-level LiDAR height metrics with field-derived Lorey's mean height showed a significant correlation (Garcia-Mailliard $r = 0.94$ , $p < 0.0001$ ; North Yuba $R = 0.89$ , $p < 0.0001$ ).                                                                                                                                                                                          | (1) 38<br>(2) 40 | – | –                      | –  | –    | 82 ± 0.7 Mg/ha in Garcia-Mailliard and 140 ± 0.9 Mg/ha in North Yuba                                                       |
| 12   | Non-linear (machine learning)         | Regression tree                                                                                                                                                                                                                                                                                                                                                                                       | 175              | – | –                      | 30 | –    | –                                                                                                                          |
| 13   | Linear                                | Regression parameters for crown surface area vs calculated individual tree biomass for lodgepole pine and                                                                                                                                                                                                                                                                                             | 36               | – | –                      | 36 | –    | For conifer plots: 30 ton/ha (MFM: 23.0 ton/ha; SMA: 27.9 ton/ha; NDVI: 29.7 ton/ha). The average difference for deciduous |

|    |                                    |                                                                                                                                                                                                                                                                                                                                                                               |    |                          |       |    |                 |                                                                                          |
|----|------------------------------------|-------------------------------------------------------------------------------------------------------------------------------------------------------------------------------------------------------------------------------------------------------------------------------------------------------------------------------------------------------------------------------|----|--------------------------|-------|----|-----------------|------------------------------------------------------------------------------------------|
|    |                                    | trembling aspen with coefficient values of $R^2 = 0.63$ and $R^2 = 0.52$ , respectively                                                                                                                                                                                                                                                                                       |    |                          |       |    |                 | plots using MFM was 43.8 ton/ha, more than both NDVI (41.7 ton/ha) and SMA (39.3 ton/ha) |
| 14 | Linear (multiple)                  | These were the ratio of the texture parameters of AVNIR-2 ( $R^2 = 0.899$ and RMSE = 32.04), the ratio of the texture parameters of SPOT-5 ( $R^2 = 0.916$ and RMSE = 29.09), and the ratio of the texture parameters of both sensors together ( $R^2 = 0.939$ and RMSE = 24.77)                                                                                              | 50 | –                        | 0.93  | 50 | 0.911           | 500 ton/ha                                                                               |
| 15 | [25] Non-linear (machine learning) | –                                                                                                                                                                                                                                                                                                                                                                             | 96 | $y = 0.0061 \cdot d1.30$ | 0.978 | 42 | 0.843 and 0.816 | –                                                                                        |
| 16 | Non-linear (machine learning)      | The Random Forest regression produced the highest $R^2$ (0.76), and the lowest root mean square error of prediction (RMSEP) (0.441 kg/m <sup>2</sup> ) using the three NDVIs compared with the top NDVIs, which produced a $R^2$ 0.63 and RMSEP of 0.505.1 kg/m <sup>2</sup> , and the standard NDVI, which yielded an $R^2$ of 0.31 and a RMSEP of 0.858.1 kg/m <sup>2</sup> | 82 | –                        | –     | 25 | 0.76            | 3.4365 kg/m <sup>2</sup>                                                                 |
| 17 | Linear (multiple)                  | Stand basal area (BA) and AGB estimates were also closely related to canopy texture indices, and these relationships remained reasonably stable regardless of whether all trees were considered ( $R^2$ ¼ 0.74 and 0.78 for both parameters                                                                                                                                   | 15 | –                        | –     | –  | 0.75            | –                                                                                        |

|                                                                                                                                                        |                               |                                                                                                                                                                                                                                           |     |                                                                                                                     |                                               |    |                                                                                                                                             |                                                                        |
|--------------------------------------------------------------------------------------------------------------------------------------------------------|-------------------------------|-------------------------------------------------------------------------------------------------------------------------------------------------------------------------------------------------------------------------------------------|-----|---------------------------------------------------------------------------------------------------------------------|-----------------------------------------------|----|---------------------------------------------------------------------------------------------------------------------------------------------|------------------------------------------------------------------------|
| with GE and IKONOS, respectively) or only the most significant trees ( $R^2$ ¼0.72 and 0.74–0.75 for both parameters with GE and IKONOS, respectively) |                               |                                                                                                                                                                                                                                           |     |                                                                                                                     |                                               |    |                                                                                                                                             |                                                                        |
| [35]                                                                                                                                                   |                               |                                                                                                                                                                                                                                           |     |                                                                                                                     |                                               |    |                                                                                                                                             |                                                                        |
| 18                                                                                                                                                     | Non-linear (machine learning) | –                                                                                                                                                                                                                                         | 45  | AGB =<br>0.16*[Elevation] +<br>0.27*[Band 1] – 0.11*[Band 2] +<br>0.41*[Band 4] – 0.03                              | –                                             | 45 | 0.66                                                                                                                                        | 345 ± 72.5 Mg ha <sup>−1</sup>                                         |
| 19                                                                                                                                                     | Linear (multiple)             | –                                                                                                                                                                                                                                         | 26  | y = ax + b                                                                                                          | –                                             | 26 | 0.85                                                                                                                                        | 26 Mg/ha to 460 Mg/ha                                                  |
| [47]                                                                                                                                                   |                               |                                                                                                                                                                                                                                           |     |                                                                                                                     |                                               |    |                                                                                                                                             |                                                                        |
| 20                                                                                                                                                     | Linear                        | –                                                                                                                                                                                                                                         | 23  | y = pxq<br>where x is the independent variable, y is the dependent Variable, and p and q are regression parameters. | 0.65                                          | 23 | 0.72                                                                                                                                        | –                                                                      |
| 21                                                                                                                                                     | Linear                        | The models were validated using a coefficient of determination (linear regression) between calculated stocks through the CPA and DBH relationship and predicted carbon stocks                                                             | 65  | For <i>Shorea robusta</i> = (y = 9.9773x – 88.303) For others = (y = 12.523x – 115.91)                              | <i>Shorea robusta</i> = 0.65<br>others = 0.62 | 20 | <i>Shorea robusta</i> = 0.60<br>others = 0.82                                                                                               | –                                                                      |
| [19]                                                                                                                                                   |                               |                                                                                                                                                                                                                                           |     |                                                                                                                     |                                               |    |                                                                                                                                             |                                                                        |
| 22                                                                                                                                                     | Linear                        | Development of the relationship between crown projection area (CPA), height, and AGB resulted in accuracies of $R^2$ ranging from 0.62 to 0.81 and RMSE ranging from 10 to 25% for <i>Shorea robusta</i> and other species, respectively. | 109 | –                                                                                                                   | –                                             | 91 | Community forest ( <i>Shorea robusta</i> ) = 0.81<br>Community forest (other species) = 0.62<br>Government forest ( <i>Shorea robusta</i> ) | 244 and 140 ton C/ha for community and government forests respectively |

|    |                   |                                                                                                                                                                                                                                                                                                                                                                                                                    |     |                                                                                                                                                                        |                                                      |    |        |                                                                                                                                                                                                                                                                                                                                                                                                      |                                                                    |
|----|-------------------|--------------------------------------------------------------------------------------------------------------------------------------------------------------------------------------------------------------------------------------------------------------------------------------------------------------------------------------------------------------------------------------------------------------------|-----|------------------------------------------------------------------------------------------------------------------------------------------------------------------------|------------------------------------------------------|----|--------|------------------------------------------------------------------------------------------------------------------------------------------------------------------------------------------------------------------------------------------------------------------------------------------------------------------------------------------------------------------------------------------------------|--------------------------------------------------------------------|
|    |                   |                                                                                                                                                                                                                                                                                                                                                                                                                    |     |                                                                                                                                                                        |                                                      |    |        |                                                                                                                                                                                                                                                                                                                                                                                                      | = 0.69<br>Govern<br>ment<br>forest<br>(other<br>species)<br>= 0.73 |
| 23 | Linear            | The field-measured aboveground biomass (AGB_f) was highly correlated with DBH, with $R$ coefficients of 0.85. However, DBH had the highest correlation with CA_I ( $R = 0.82$ ), followed by CD_I ( $R = 0.80$ ) and CP_I ( $R = 0.77$ ). In contrast, relatively low correlations ( $R$ coefficient ranges between 0.54 and 0.57) were found between field-measured Ht_f and the satellite-based crown variables. | 50  | $y = 0.7403x$                                                                                                                                                          | 0.7197                                               | 50 | 0.7197 | 50 and 12,000 ton/ha                                                                                                                                                                                                                                                                                                                                                                                 |                                                                    |
| 24 | Linear (multiple) | Regression analysis was carried out for all land-use types, and the FOTO-derived and field AGB values were strongly correlated ( $R^2 = 0.9795$ , $p = 0.000352$ )                                                                                                                                                                                                                                                 | 196 | All land use types (a) = $y = 1.1677x$ ;<br>Heavily logged forest (b) = $y = 0.7809x$ ;<br>Old growth forest (c) = $y = 1.125x$ ;<br>Lightly logged (d) = $y = 0.945x$ | (a) = 0.97<br>(b) = 0.95<br>(c) = 0.85<br>(d) = 0.96 | –  | 0.9795 | FOTO-derived biomass values indicated that twice-logged forest or LF had an AGB of 120–155 Mg/ha, while oil palm plantations had the lowest FOTO-derived AGB values, 0–80 Mg/ha; the lightly logged forests or the VJR showed very high values for FOTO-derived AGB (180–270 Mg/ha). Small patches of unlogged forest tracts had the highest FOTO-derived AGB values, ranging from 270 to 372 Mg/ha. |                                                                    |

|    |                               |                                                                                                                                                                                                                                                |                   |                                                                                                                                                                                                                                                                                                                                                     |                                      |    |                                      |                                                                                                                                         |
|----|-------------------------------|------------------------------------------------------------------------------------------------------------------------------------------------------------------------------------------------------------------------------------------------|-------------------|-----------------------------------------------------------------------------------------------------------------------------------------------------------------------------------------------------------------------------------------------------------------------------------------------------------------------------------------------------|--------------------------------------|----|--------------------------------------|-----------------------------------------------------------------------------------------------------------------------------------------|
| 25 | Linear                        | Crown horizontal projection vs aboveground biomass per plot with inventory data ( $R^2 = 0.965$ )                                                                                                                                              | 17                | –                                                                                                                                                                                                                                                                                                                                                   | Model 1 = 0.900<br>Model 2 = 0.999   | 17 | 0.965                                | 23.2 ton/ha                                                                                                                             |
| 26 | Linear                        | For this research, a multi-resolution segmentation technique was applied to segment tree crown onto fused LiDAR and WorldView-2 data.                                                                                                          | 72                | <i>S. robusta</i> :<br>$-0.877 + 0.597\text{CPA} + 1.873\text{CHM}$<br><i>S. wallichii</i> :<br>$-0.144 + 1.124\text{CPA} + 0.883\text{CHM}$<br><i>L. parviflor</i> :<br>$0.205 + 0.370\text{CPA} + 1.494\text{CHM}$<br><i>T. tomentosa</i> :<br>$-0.126 + 0.45\text{CPA} + 1.848\text{CHM}$<br>Others: $0.044 + 0.616\text{CPA} + 1.396\text{CHM}$ | 0.66<br>0.75<br>0.60<br>0.82<br>0.64 |    | 0.94<br>0.84<br>0.78<br>0.76<br>0.78 | 216.38 MgC/ha                                                                                                                           |
| 27 | Non-linear (machine learning) | [20]<br>Random Forest algorithm applied using solely spectral (S), textural (T), or photogrammetric (P) predictors as well as combinations of them, i.e., S+T, S+P, T+P, and S+T+P.                                                            | (1) 98<br>(2) 101 | –                                                                                                                                                                                                                                                                                                                                                   | –                                    | –  |                                      |                                                                                                                                         |
| 28 | Non-linear (machine learning) | Four semi- or non-parametric regression models in terms of their biomass estimation accuracy: Random Forest, generalized additive models and two boosted algorithms, generalized boosted regression models and the boosted version of the GAM. | 303               | –                                                                                                                                                                                                                                                                                                                                                   | Best results<br>Random Forest: 0.73  |    |                                      | 29.4 ton/ha                                                                                                                             |
| 29 | Non-linear (machine learning) | A backpropagation artificial neural network (BP ANN) using B5 (red band), B7 (near-infrared-1 band), and B8 (near-infrared-2 band) of                                                                                                          | 91                | –                                                                                                                                                                                                                                                                                                                                                   | –                                    | –  | –                                    | Mixed species:<br>72.26 ton/ha<br>Dummy species:<br>40.15 ton/ha<br><i>K. candel</i> : 52.38 ton/ha<br><i>S. apetala</i> : 24.32 ton/ha |

|    |                   |                                                                                                                                                                                                                                          |     |                                                                   |                                   |     |              |                                                                                                                                                                                                                                                                                                                                                                                                                                                                                         |
|----|-------------------|------------------------------------------------------------------------------------------------------------------------------------------------------------------------------------------------------------------------------------------|-----|-------------------------------------------------------------------|-----------------------------------|-----|--------------|-----------------------------------------------------------------------------------------------------------------------------------------------------------------------------------------------------------------------------------------------------------------------------------------------------------------------------------------------------------------------------------------------------------------------------------------------------------------------------------------|
|    |                   | the Worldview-2 images were used to calculate six vegetation indices, including the normalized difference vegetation index (NDVI), the simple ratio index (SRI), and the difference vegetation index (DVI)                               |     |                                                                   |                                   |     |              |                                                                                                                                                                                                                                                                                                                                                                                                                                                                                         |
|    | [21]              | Normalized difference vegetation index (NDVI)                                                                                                                                                                                            |     |                                                                   |                                   |     |              |                                                                                                                                                                                                                                                                                                                                                                                                                                                                                         |
| 30 | Linear            | Vegetation index number (VIN)<br>Ratio vegetation index (RVI)<br>Normalized difference greenness index (NDGI)<br>Transformed vegetation index (TVI)                                                                                      | 8   | Best model<br>$\log \text{AGB} = -3.208 \cdot \text{RVI} + 2.185$ | 0.582                             | –   | –            | –                                                                                                                                                                                                                                                                                                                                                                                                                                                                                       |
| 31 | Linear (multiple) | We investigated these simulated images' respective merits of the FOTO method and the lacunarity analysis in predicting AGB both locally (within sites) and globally (across sites).<br>Combined FL model (combining FOTO and lacunarity) | 279 | –                                                                 | Best result<br>( $R^2_v = 0.69$ ) | 230 | $R^2 = 0.47$ | It is noteworthy that site-level MSDs seemed to decrease with the range of biomass encompassed across plots in a site: while plots in Yellapur (MSD = 10.3%) and Paracou (MSD = –18.1%) were restricted to low and high biomass levels, respectively; in Uppangala (MSD = –5.3%) plots have been sampled along a biomass gradient spanning from ~150 up to > 600 $\text{Mg ha}^{-1}$ . A practical application of the method to a mosaic of forest types in the Congo basin showed that |

|    |                               |                                                                                                                                                                                                                                                                                                                                                                     |    |                                                                                                                                                                                                                                                                                                                                                                                            |                                                                   |    |                                                                                |                                                                                                                                                                                                                                                                                 |
|----|-------------------------------|---------------------------------------------------------------------------------------------------------------------------------------------------------------------------------------------------------------------------------------------------------------------------------------------------------------------------------------------------------------------|----|--------------------------------------------------------------------------------------------------------------------------------------------------------------------------------------------------------------------------------------------------------------------------------------------------------------------------------------------------------------------------------------------|-------------------------------------------------------------------|----|--------------------------------------------------------------------------------|---------------------------------------------------------------------------------------------------------------------------------------------------------------------------------------------------------------------------------------------------------------------------------|
|    |                               |                                                                                                                                                                                                                                                                                                                                                                     |    |                                                                                                                                                                                                                                                                                                                                                                                            |                                                                   |    |                                                                                | forest AGB inferences could be made with reasonable precision (i.e., ≤25% of error) up to 600 Mg ha <sup>-1</sup> , without saturation. Average AGB over 49 field plots of 359 ± 98 Mg ha <sup>-1</sup>                                                                         |
| 32 | Non-linear (machine learning) | Estimation of aboveground biomass (AGB) at ICESat/GLAS footprint level was done by integrating data from multiple sensors using two regression algorithms, viz. Random Forest (RF) and support vector machine (SVM). Multiple linear regression (MLR) was also utilized to estimate AGB when the number of variables was reduced using machine learning regression. | 40 | Biomass = 0.343 * wdistance + 0.37 * wextent + 0.008 * Correlation2 - 0.0083 * NIR2max - 6.5 * IRGVI2max - SVM regression 0.137 * H75 + 47.125 where wdistance = top tree height wextent = LiDAR spectral parameter Correlation2 = texture parameters NIR2max = Satellite image spectral parameter IRGVI2max = Satellite image spectral parameter H75 = Satellite image spectral parameter |                                                                   | –  | –                                                                              | It was found that the SVM regression algorithm explained 88.7% of the variation in AGB with an RMSE of 13.6 Mg ha <sup>-1</sup> on the combined datasets, while the RF regression algorithm explained 83.5% of the variation in AGB with an RMSE of 20.57 Mg ha <sup>-1</sup> . |
| 33 | Linear                        | Normalized difference vegetation index (NDVI) Pearson's correlation was used to test which of these variables was                                                                                                                                                                                                                                                   | 50 | Intact forest: AGBT (intact forest) = exp(2.62 · ln DBH-2.30) Degraded forest: AGBT (degraded                                                                                                                                                                                                                                                                                              | Intact forest regression = 0.89 degraded forest regression = 0.87 | 25 | Intact forest regression on: R <sup>2</sup> = 0.812 Degraded forest regression | Average of 1058 kg for intact forest and 147 kg for degraded forest                                                                                                                                                                                                             |

|      |                      |                                                                                                                |    |                                                                                                                                                                                                                                                                                                                                                                                                                |                                                                     |                |   |                                                                                                                                                                                                                                                                                                                                                                       |
|------|----------------------|----------------------------------------------------------------------------------------------------------------|----|----------------------------------------------------------------------------------------------------------------------------------------------------------------------------------------------------------------------------------------------------------------------------------------------------------------------------------------------------------------------------------------------------------------|---------------------------------------------------------------------|----------------|---|-----------------------------------------------------------------------------------------------------------------------------------------------------------------------------------------------------------------------------------------------------------------------------------------------------------------------------------------------------------------------|
|      |                      | most closely related to field-derived AGB. Least square regression was used for generating a statistical model |    | forest)=0.0829<br>·DBH2.43                                                                                                                                                                                                                                                                                                                                                                                     |                                                                     | on =<br>0.7142 |   |                                                                                                                                                                                                                                                                                                                                                                       |
| 34   | Linear<br>(multiple) | Fourier transform based textural ordination (FOTO)                                                             | 15 | –                                                                                                                                                                                                                                                                                                                                                                                                              | IKONOS $R^2 = 0.82$<br>Carto-A $R^2 = 0.76$<br>Carto-F $R^2 = 0.76$ | –              | – | The estimated AGB values from the 15 large (1 ha) plots covered a significant range of biomass varying from a minimum of 124 t ha <sup>-1</sup> to a maximum of 684 t ha <sup>-1</sup> , with an average of 435 t ha <sup>-1</sup> . RMSEs computed for predicted and field measured biomass using IKONOS and Carto-A imagery were 67.03 and 77.32 t ha <sup>-1</sup> |
| [11] |                      |                                                                                                                |    | $W = ww + wbr + wl$ $wl = 0.09980 * d ^ {1.39252} * (h/d)^{0.71962}$ $wbr = 0.0308 * d^{2.75761}*(h/d)^{-0.39381}$ $ww = 0.0146*d^{1.94}687*h^{1.10657}$ $7$ <p>where d is the diameter at breast height, h is the total height, W is the total above ground biomass, ww is the biomass of wood, wbr is the biomass of branches, wl is the biomass of leaves.</p> $W = b*CHP$ <p>where b is the regression</p> |                                                                     |                |   |                                                                                                                                                                                                                                                                                                                                                                       |
| 35   | Linear               | Normalized difference vegetation index (NDVI)                                                                  | 57 |                                                                                                                                                                                                                                                                                                                                                                                                                | $R^2 = 0.719$                                                       | –              | – | The aboveground biomass estimated with M5 was 32.3 Mg ha <sup>-1</sup> in 2004, 16.3 Mg ha <sup>-1</sup> in 2007, and 10.8 Mg ha <sup>-1</sup> in 2011                                                                                                                                                                                                                |

|    |                              |                                                                                                                                                                                                                                                                                                                                                               |                                                    |                                                                                                                                                                                                  |                                                                                                                                                                                                                                                                                                                                                                                                                                                                              |                                                       |                                                                                                                                                                                                                                                                                          |                                                                                                                                                                                                                                                                                                                                 |
|----|------------------------------|---------------------------------------------------------------------------------------------------------------------------------------------------------------------------------------------------------------------------------------------------------------------------------------------------------------------------------------------------------------|----------------------------------------------------|--------------------------------------------------------------------------------------------------------------------------------------------------------------------------------------------------|------------------------------------------------------------------------------------------------------------------------------------------------------------------------------------------------------------------------------------------------------------------------------------------------------------------------------------------------------------------------------------------------------------------------------------------------------------------------------|-------------------------------------------------------|------------------------------------------------------------------------------------------------------------------------------------------------------------------------------------------------------------------------------------------------------------------------------------------|---------------------------------------------------------------------------------------------------------------------------------------------------------------------------------------------------------------------------------------------------------------------------------------------------------------------------------|
|    |                              |                                                                                                                                                                                                                                                                                                                                                               |                                                    | coefficient, W<br>is the<br>aboveground<br>biomass, CHP<br>is the crown<br>horizontal<br>projection,                                                                                             |                                                                                                                                                                                                                                                                                                                                                                                                                                                                              |                                                       |                                                                                                                                                                                                                                                                                          |                                                                                                                                                                                                                                                                                                                                 |
| 36 | Linear<br>(multiple)         | Fourier transform<br>based textural<br>ordination (FOTO)                                                                                                                                                                                                                                                                                                      | 21                                                 | AGBtree =<br>$0.0673$<br>$(q \cdot DBH^2 \cdot H)$<br>$\wedge 0.0976$                                                                                                                            | $R^2 = 0.82$                                                                                                                                                                                                                                                                                                                                                                                                                                                                 | -                                                     | $R^2 = 0.76$                                                                                                                                                                                                                                                                             | The predicted<br>mean AGB values<br>for the wet zone<br>plots ranged<br>between 141 Mg<br>$ha^{-1}$ and 486 Mg<br>$ha^{-1}$<br>A separate<br>texture–AGB<br>model was fitted<br>for dry zone<br>ground control<br>plots, which<br>predicted low<br>biomass values<br>ranging between<br>159 Mg $ha^{-1}$ to 228<br>Mg $ha^{-1}$ |
| 37 | [26]<br>Linear<br>(multiple) | Ordinary least<br>squares (OLS)                                                                                                                                                                                                                                                                                                                               | 166 (no. of<br>trees out of<br>32 two-ha<br>plots) | AGBest =<br>$0.0673$<br>$(q \cdot DBH^2 \cdot H)$<br>$\wedge 0.0976$                                                                                                                             | $R^2 = 0.952$ (best<br>model)                                                                                                                                                                                                                                                                                                                                                                                                                                                | 79 (no. of<br>trees out<br>of 32,<br>two-ha<br>plots) | $R^2 =$<br>0.914<br>(best<br>Model)                                                                                                                                                                                                                                                      | 655–12,300<br>kg/trees (best<br>model)                                                                                                                                                                                                                                                                                          |
| 38 | Linear<br>(multiple)         | The relationship<br>between natural<br>forests aboveground<br>biomass and image<br>texture variables<br>was modeled using<br>a Random Forest<br>(RF) algorithm and<br>multiple linear<br>regression (MLR).<br>Raw band textures,<br>two-band textures,<br>and three-band<br>texture using<br>multiple linear<br>regression and<br>Random Forest<br>regression | 63 plots                                           | AGB = $0.112 \times$<br>$(qD^2H)0.916$ ,<br>where AGB is<br>total<br>aboveground<br>biomass, q is<br>wood density,<br>D is the<br>diameter at<br>ground level,<br>and H is total<br>tree height. | Multivariate<br>analysis results<br>for the three<br>image<br>processing<br>techniques<br>showed that<br>single-texture<br>bands<br>produced the<br>lowest overall<br>accuracy ( $R^2 =$<br>$0.64$ and $RMSE$<br>$= 94.13 \text{ kg m}^{-2}$ )<br>followed by<br>some<br>improvements<br>using the two-<br>band texture<br>combination<br>( $R^2 = 0.85$ and<br>$RMSE = 60.65$<br>$\text{kg m}^{-2}$ ).<br>However, the<br>highest overall<br>accuracy was<br>obtained using | 27                                                    | Three-<br>band<br>texture<br>models<br>produce<br>d the<br>highest<br>overall<br>predicte<br>d<br>perform<br>ance<br>with an<br>$R^2$ of<br>$0.88$ and<br>$0.77$<br>compar<br>ed with<br>both the<br>two-<br>band<br>texture<br>ratios<br>( $R^2 =$<br>$0.85$ and<br>$0.67$ )<br>and the | $268.79 \text{ kg/m}^{-2}$                                                                                                                                                                                                                                                                                                      |

|      |                   |                                                                                                                                                                                                                                                                                                                                            |          |                                                                                                                                                                                                                                                                                                                   | the three-band texture combination ( $R^2 = 0.88$ and RMSE = 54.54 kg m <sup>-2</sup> ). |    | raw texture bands ( $R^2 = 0.64$ and 0.53) |                                                                                                                                             |
|------|-------------------|--------------------------------------------------------------------------------------------------------------------------------------------------------------------------------------------------------------------------------------------------------------------------------------------------------------------------------------------|----------|-------------------------------------------------------------------------------------------------------------------------------------------------------------------------------------------------------------------------------------------------------------------------------------------------------------------|------------------------------------------------------------------------------------------|----|--------------------------------------------|---------------------------------------------------------------------------------------------------------------------------------------------|
| [52] |                   | Tree canopy cover (TCC) vs. forest aboveground biomass (FAGB) model.<br>A multivariate adaptive regression splines (MARS) machine learning algorithm was used to develop a model from the relationship between different predictor parameters from Landsat 8 bands and its vegetation indices with the FAGB of GEVHR virtual sample plots. |          |                                                                                                                                                                                                                                                                                                                   |                                                                                          |    |                                            |                                                                                                                                             |
| 39   | Linear            |                                                                                                                                                                                                                                                                                                                                            | 30 plots | $y = 1.0865x - 62.078$                                                                                                                                                                                                                                                                                            | ( $R^2$ ) of 0.76                                                                        | 20 | ( $R^2$ ) = 0.83                           | The average forest aboveground carbon (FAGC) estimated was 260 tons ha <sup>-1</sup> , while in the field, it was 249 tons ha <sup>-1</sup> |
| 40   | Linear (multiple) | Multiple regression analysis<br>Digital canopy model (DCM)                                                                                                                                                                                                                                                                                 | 57 plots | AGB = exp (2.134 + 2.530 ln (DBH))<br>AGBF = 0 + 1 hmax + 2 hmin + 3 hmean for LiDAR<br>AGBL = 0 + $\sum_{k=1}^5 (k_{mk} + k_{sk})$ for satellite data                                                                                                                                                            | $R^2 = 0.90$ for LiDAR<br>$R^2 = 0.73$ for satellite data                                | –  | –                                          | RMSE = 38.7 Mg/ha from LiDAR<br>RMSE = 42.8 Mg/ha from aatellite data                                                                       |
| [45] |                   |                                                                                                                                                                                                                                                                                                                                            |          |                                                                                                                                                                                                                                                                                                                   |                                                                                          |    |                                            |                                                                                                                                             |
| 41   | Linear            | Simple reason (SR) NDVI (normalized difference vegetation index)<br>SAVI (soil-adjusted vegetation index)                                                                                                                                                                                                                                  | 29       | Bio = $\beta_0 + \beta_1 \cdot \text{DBH} + 14.4 \cdot 0.86 - 2901.85 \cdot 96.3$<br>Bio = $\beta_1 \cdot \text{NDVI}_2 + 37.8 \cdot 0.87 - 23168.7$<br>Bio = $\beta_1 \cdot \text{B1} + 38.8 \cdot 0.87 - 51.8$<br>Bio = $\beta_1 \cdot (\text{NDVI}) + \beta_2 \cdot (\text{SR}) + \beta_3 \cdot (\text{SAVI})$ | 0.87                                                                                     | –  | –                                          | –                                                                                                                                           |
| 42   | Linear (multiple) | Normalized difference vegetation index                                                                                                                                                                                                                                                                                                     | 48       | –                                                                                                                                                                                                                                                                                                                 | Site 1 (LiDAR $R^2 = 0.82$ and Orthophoto $R^2$                                          | .  | Site 1 (LiDAR $R^2 = 0.62$                 | Site 1 (LiDAR RMSE = 35.5 mg ha <sup>-1</sup> and                                                                                           |

|    |        |                                                                                                                                                                                                                                                                                                                                         |                                                                           |                                                                                                                                                         |                                                                                                                                                                                                                                                                                                                                                         |                                                                            |                                                                                                                                                |                                                                                                                                                                                                                                                                                                                                                                                                                                         |
|----|--------|-----------------------------------------------------------------------------------------------------------------------------------------------------------------------------------------------------------------------------------------------------------------------------------------------------------------------------------------|---------------------------------------------------------------------------|---------------------------------------------------------------------------------------------------------------------------------------------------------|---------------------------------------------------------------------------------------------------------------------------------------------------------------------------------------------------------------------------------------------------------------------------------------------------------------------------------------------------------|----------------------------------------------------------------------------|------------------------------------------------------------------------------------------------------------------------------------------------|-----------------------------------------------------------------------------------------------------------------------------------------------------------------------------------------------------------------------------------------------------------------------------------------------------------------------------------------------------------------------------------------------------------------------------------------|
|    |        | (NDVI)<br>Enhanced<br>vegetation index<br>(EVI)                                                                                                                                                                                                                                                                                         |                                                                           |                                                                                                                                                         | = 0.70)<br>Site 2 (LiDAR<br>$R^2 = 0.88$ and<br>Orthophoto $R^2$<br>= 0.91)<br>Combined =<br>0.85                                                                                                                                                                                                                                                       |                                                                            | and<br>Orthoph<br>oto $R^2 =$<br>0.52)<br>Site 2<br>(LiDAR<br>$R^2 = 0.85$<br>and<br>Orthoph<br>oto $R^2 =$<br>0.86)<br>Combin<br>ed =<br>0.69 | Orthophoto<br>RMSE= 42.6 mg<br>ha <sup>-1</sup> )<br>Site 2 (LiDAR<br>RMSE = 14.4 mg<br>ha <sup>-1</sup> and<br>Orthophoto<br>RMSE= 13.6 mg<br>ha <sup>-1</sup> )<br>Combined = 33.0<br>mg ha <sup>-1</sup>                                                                                                                                                                                                                             |
|    | [27]   |                                                                                                                                                                                                                                                                                                                                         |                                                                           |                                                                                                                                                         | Bt = Bs + Bsb +<br>Bb + Bt + Bf,<br>where Bt is<br>the total<br>aboveground<br>biomass, Bs is<br>the stem, Bsb<br>is the stem<br>bark, Bb is the<br>branch, and<br>Bt is the twig,<br>Bf is the<br>foliage<br>biomass. All<br>parts of trees<br>were<br>separated,<br>followed by<br>in situ<br>measurement<br>of each part's<br>total fresh<br>weight. |                                                                            |                                                                                                                                                | In this study, the<br>highest amount of<br>carbon<br>sequestration was<br>estimated for <i>P.</i><br><i>eldarica</i> (4462.18 t<br>ha <sup>-1</sup> ), followed by<br><i>C. arizonica</i><br>(2103.37 t ha <sup>-1</sup> )<br>plantations,<br>whereas the<br>lowest amount<br>was estimated for<br><i>M. alba</i> (1009.09 t<br>ha <sup>-1</sup> ) and <i>R.</i><br><i>pseudoacacia</i><br>(365.38 t ha <sup>-1</sup> )<br>plantations. |
| 43 | Linear | DBH, height, crown<br>diameter, and stem<br>length                                                                                                                                                                                                                                                                                      | 48                                                                        |                                                                                                                                                         | Total biomass<br>$R^2 = 0.90$ (RMSE<br>= 24.92 t ha <sup>-1</sup> )<br>Dry biomass $R^2$<br>= 0.91 (RMSE =<br>12.74 t ha <sup>-1</sup> )                                                                                                                                                                                                                | –                                                                          | –                                                                                                                                              |                                                                                                                                                                                                                                                                                                                                                                                                                                         |
| 44 | Linear | Mean bands 1 to 5<br>Standard deviation<br>bands 1 to 5<br>The ratio of mean to<br>the standard<br>deviation for all<br>bands<br>Standard deviation.<br>Ratios<br>Red vegetation<br>index<br>Green vegetation<br>index<br>Green red<br>vegetation index<br>Normalized<br>difference<br>vegetation index<br>Enhanced<br>vegetation index | 85% for<br>training<br>Random<br>Forests (RF)–<br>435 plots out<br>of 500 | AGB = $D \times \bar{y}$ ,<br>where $D$ is<br>the total<br>study area<br>and $\bar{y}$ is the<br>average AGB<br>ha <sup>-1</sup> of the<br>sample areas | The best results<br>were found<br>using the<br>Random<br>Forests<br>algorithm ( $R^2 =$<br>0.69)                                                                                                                                                                                                                                                        | 15% for<br>training<br>Random<br>Forests<br>(RF)–77<br>plots out<br>of 500 | RF with<br>very<br>high<br>accuraci<br>es (i.e.,<br>RMSE~1<br>5, $R^2 =$<br>0.93),                                                             | We found an<br>average of 22.1<br>tons per ha of<br>aboveground<br>biomass (AGB)                                                                                                                                                                                                                                                                                                                                                        |

---

Soil-adjusted  
vegetation index  
Shadow index  
Modified transverse  
vegetation index  
Modified  
chlorophyll  
absorption  
reflectance index  
Bare soil index  
Shadow to soil ratio  
GLCM texture  
features  
Bare soil  
Shadow

---
