# Supplementary material for: Forest Aboveground Biomass Estimation and Mapping through High-Resolution Optical Satellite Imagery—A Literature Review
Source: MDPI journal article supplement (doi:10.3390/f12070914), 2021-07-14
Supplement: s1 [file s1]

Archive with 1 entries (1 files):
- forests-1174791-supplementary.pdf
